# Supplementary material
Source: publisher site journal article supplement (https://www.aging-us.com/papers/v5/n11/pdf/100614.pdf)
Supplement: Supplementary file 1 [file 100614.pdf]

Aging
